# Supplementary material for: Development of a data utility framework to support effective health data curation
Source: HighWire-hosted journal article supplement (doi:10.1136/bmjhci-2020-100303), 2021-05-01
Supplement: bmjhci-2020-100303supp001_data_supplement.pdf [file bmjhci-2020-100303supp001_data_supplement.pdf]

**Online Supplemental Table 1.** Framework as at March 2020

| Category           | Dimension                | Definition                                                                                                                                     |
|--------------------|--------------------------|------------------------------------------------------------------------------------------------------------------------------------------------|
| <b>Description</b> | Metadata Completeness    | Level of metadata completed                                                                                                                    |
|                    | Metadata Quality         | Richness of metadata completion – including within required formats and quality of qualitative fields                                          |
| <b>Scale</b>       | Coverage                 | Number of individuals included in the dataset                                                                                                  |
|                    | Duration                 | Length of time to which the data relates                                                                                                       |
|                    | Depth                    | Number of information available per individual (e.g. number of fields)                                                                         |
| <b>Service</b>     | Format                   | The presentation of the data – to be presented in useful formats / interoperable standards                                                     |
|                    | Timeliness               | How quickly the data can be provided – in a useful timescale                                                                                   |
| <b>Quality</b>     | Completeness             | The proportion of data entries that should be populated are populated (and inverse – proportion that should not be populated are not)          |
|                    | Consistency / Uniformity | Data are presented in the required format and a similar way – e.g. field types, date formats                                                   |
|                    | Uniqueness               | Lack of duplication                                                                                                                            |
|                    | Validity                 | Data are valid based on acceptable “rules” e.g. age between 0 and 120, pregnancy in male patients, physiological readings within normal ranges |
|                    | Accuracy / Verification  | The extent to which the data reflects the “real-world”, e.g. level of certainty that fields are accurate                                       |
|                    | “Usefulness”             | Qualitative, subjective measure by user (e.g. NPS / star rating)                                                                               |
| <b>Added Value</b> | Linkage / Mapping        | Ability to link with other datasets                                                                                                            |
|                    | Annotation               | Additional fields added to provide further information, including phenotyping                                                                  |
