# Supplementary material for: Development of a data utility framework to support effective health data curation
Source: HighWire-hosted journal article supplement (doi:10.1136/bmjhci-2020-100303), 2021-05-01
Supplement: bmjhci-2020-100303supp003_data_supplement.pdf [file bmjhci-2020-100303supp003_data_supplement.pdf]

Online Supplemental Table 3. Framework as at May 2020

| Category                  | Dimension                                            | Definition                                                                                      | Bronze                                                                                                       | Silver                                                                                                         | Gold                                                                                                                     | Platinum                                                                                                        |
|---------------------------|------------------------------------------------------|-------------------------------------------------------------------------------------------------|--------------------------------------------------------------------------------------------------------------|----------------------------------------------------------------------------------------------------------------|--------------------------------------------------------------------------------------------------------------------------|-----------------------------------------------------------------------------------------------------------------|
| <b>Data Documentation</b> | Documentation Quality                                | Weighted Data Documentation Score                                                               | < 66% of metadata specification fields meet format and content requirements                                  | < 76% of metadata specification fields meet format and content requirements                                    | < 86% of metadata specification fields meet format and content requirements                                              | < 96% of metadata specification fields meet format and content requirements                                     |
|                           | Availability of additional documentation and support | Available dataset documentation in addition to the data dictionary                              | Past journal articles demonstrate that knowledge of the data exists                                          | Comprehensive ReadMe describing extracting and use of data, Dataset FAQs available, Visual data model provided | Dataset publication was supported with a journal article explaining the dataset in detail, or dataset training materials | Support personnel available to answer any questions                                                             |
|                           | Data Model                                           | Availability of clear, documented data model                                                    | Known and accepted data model but some key field uncoded or free text                                        | Key fields codified using a local standard                                                                     | Key fields codified using a national or international standard                                                           | Data Model conforms to a national standard and key fields codified using a national / international standard    |
|                           | Data Dictionary                                      | Provided documented data dictionary and terminologies                                           | Data definitions available                                                                                   | Definitions compiled into local data dictionary which is available online                                      | Dictionary relates to national definitions                                                                               | Dictionary is based on international standards and includes mapping(?)                                          |
|                           | Provenance                                           | Clear description of source and history of the dataset, providing a "transparent data pipeline" | Source of the dataset is documented                                                                          | Source of the dataset and any transformations, rules and exclusions documented                                 | All original data items listed, all transformations, rules and exclusion listed and impact of these                      | Ability to view earlier versions, including "raw" or "source" dataset, and review the impact of each stage/step |
| <b>Technical Quality</b>  | Data Quality Management Process                      | The level of maturity of the data quality management processes                                  | A documented data management plan covering collection, auditing, and management is available for the dataset | Evidence that the data management plan has been implemented is available                                       | Demonstrated compliance with the data management plan                                                                    | Externally verified compliance with the data management plan                                                    |
|                           | DAMA Data Quality Element - Completeness             | The proportion of stored data against the potential of "100% complete"                          | <i>Indicators are under development by another project</i>                                                   |                                                                                                                |                                                                                                                          |                                                                                                                 |
|                           | DAMA Data Quality Element - Uniqueness               | No thing will be recorded more than once based upon how that thing is identified.               |                                                                                                              |                                                                                                                |                                                                                                                          |                                                                                                                 |

|                               |                                         |                                                                                                        |                                                                                                                  |                                                                                  |                                                                                                                   |                                                             |
|-------------------------------|-----------------------------------------|--------------------------------------------------------------------------------------------------------|------------------------------------------------------------------------------------------------------------------|----------------------------------------------------------------------------------|-------------------------------------------------------------------------------------------------------------------|-------------------------------------------------------------|
|                               | DAMA Data Quality Element - Timeliness  | The degree to which data represent reality from the required point in time.                            |                                                                                                                  |                                                                                  |                                                                                                                   |                                                             |
|                               | DAMA Data Quality Element - Validity    | Data are valid if it conforms to the syntax (format, type, range) of its definition.                   |                                                                                                                  |                                                                                  |                                                                                                                   |                                                             |
|                               | DAMA Data Quality Element - Accuracy    | The degree to which data correctly describes the "real world" object or event being described.         |                                                                                                                  |                                                                                  |                                                                                                                   |                                                             |
|                               | DAMA Data Quality Element - Consistency | The absence of difference, when comparing two or more representations of a thing against a definition. |                                                                                                                  |                                                                                  |                                                                                                                   |                                                             |
| <b>Coverage</b>               | Pathway coverage                        | Representation of Multi disciplinary healthcare data                                                   | Contains data from a single speciality or area                                                                   | Contains data from multiple specialties or services within a single tier of care | Contains multimodal data or data that is linked across two tiers (e.g. primary and secondary care)                | Contains data across the whole pathway of care              |
|                               | Length of follow up                     | Average timeframe in which a patient appears in a dataset (follow up period)                           | Between 1 - 6 months                                                                                             | Between 6 - 12 months                                                            | Between 1 - 10 years                                                                                              | More than 10 years                                          |
| <b>Access &amp; Provision</b> | Allowable uses                          | Allowable dataset usages as per the licencing agreement                                                |                                                                                                                  | Non-consented, aggregate data for specific academic uses                         | Aggregate data, for specific commercial use                                                                       | Fully consented for commercial uses                         |
|                               | Research environment                    | Access, tooling and environment (once approved)                                                        | Requested analysis can be undertaken by internal teams and provided back in anonymised format to data requestors | The dataset can be used in a trusted research environment                        | The dataset can be used in a trusted research environment, but other data and tools can be brought in as required | The dataset can be used in requesting companies environment |
|                               | Format                                  | The technical presentation of the data format (e.g. DICOM images vs PNG)                               | Format is explicitly defined                                                                                     | Format is explicitly defined and in widely readable (non-proprietary) format     |                                                                                                                   | Format is explicitly defined, in open and referenced format |

|                             |                      |                                                                                                      |                                                                   |                                                                                                    |                                                                                                                                                                         |                                                                                                                                            |
|-----------------------------|----------------------|------------------------------------------------------------------------------------------------------|-------------------------------------------------------------------|----------------------------------------------------------------------------------------------------|-------------------------------------------------------------------------------------------------------------------------------------------------------------------------|--------------------------------------------------------------------------------------------------------------------------------------------|
|                             | Access and approvals | IG Process for gaining approval to access data                                                       | Contact details for the relevant authority to request data access | Indicative timeframes for processing data access applications detailed                             | Details of application process and requirements                                                                                                                         | Detailed Information Governance Process described, outlining requirements for applications, basis of decisions, and anticipated timeframes |
|                             | Timeliness           | Data time lag + Average data access request timeframe                                                | More than 12 months                                               | Less than 12 months                                                                                | Less than 6 months                                                                                                                                                      | Less than 3 months                                                                                                                         |
| <b>Value &amp; Interest</b> | Access Request       | Number of data access inquires received                                                              | Some interest. Access inquires/requests >1                        | Some interest. Access inquires/requests >5                                                         | Some interest. Access inquires/requests >20                                                                                                                             | Some interest. Access inquires/requests >50                                                                                                |
|                             |                      | Provenance of data access inquires received                                                          | Interest and inquires from colleagues and known associates        | Interest and inquires from other national organisations                                            | Interests and inquires from national commercial organisations                                                                                                           | Interests and inquires from international bodies                                                                                           |
|                             | Current Usage        | Number of active projects and tools using the dataset                                                | > 1 active projects or tools using the dataset                    | > 5 active projects or tools using the dataset                                                     | > 10 active projects or tools using the dataset                                                                                                                         | > 30 active projects or tools using the dataset                                                                                            |
|                             | Linkages             | Ability to link with other datasets                                                                  | Identifiers to demonstrate ability to link to other datasets      | Available linkages outlined and/or List of datasets previously successfully linked provided        | List of restrictions on the type of linkages detailed. List of previously successful dataset linkages performed, with navigable links to linked datasets via at DOI/URL | Existing linkage with reusable or downstream approvals                                                                                     |
|                             | Data Enrichments     | Data sources enriched with annotations, image labels, phenomes, derivations, NLP derived data labels | The data include additional derived fields, or enriched data.     | The data include additional derived fields, or enriched data used by other available data sources. | The derived fields or enriched data were generated from, or used by, a peer reviewed algorithm.                                                                         | The data includes derived fields or enriched data from a national report.                                                                  |
