# Supplementary material for: Development of a data utility framework to support effective health data curation
Source: HighWire-hosted journal article supplement (doi:10.1136/bmjhci-2020-100303), 2021-05-01
Supplement: bmjhci-2020-100303supp004_data_supplement.pdf [file bmjhci-2020-100303supp004_data_supplement.pdf]

**Online Supplemental Table 4.** Survey questions with their responses.

| Survey Question                                                                                                                                                                                                                                                                                                                                                                                                                                                                                                                                                                                                                                                                                                                                                                                                                                                                                    | Response Type/Options                                                                                                                                                                                                                                                                                                                                                                                                                                                                                                                                                                                                                                                                                                                                                                                                                                                                                                                                                                                                                                                                                                                                                                                   |                       |                       |                       |                       |           |                |                  |                       |                       |                       |                       |                       |                 |                       |                       |                       |                       |                       |                                      |                       |                       |                       |                       |                       |            |                       |                       |                       |                       |                       |            |                       |                       |                       |                       |                       |
|----------------------------------------------------------------------------------------------------------------------------------------------------------------------------------------------------------------------------------------------------------------------------------------------------------------------------------------------------------------------------------------------------------------------------------------------------------------------------------------------------------------------------------------------------------------------------------------------------------------------------------------------------------------------------------------------------------------------------------------------------------------------------------------------------------------------------------------------------------------------------------------------------|---------------------------------------------------------------------------------------------------------------------------------------------------------------------------------------------------------------------------------------------------------------------------------------------------------------------------------------------------------------------------------------------------------------------------------------------------------------------------------------------------------------------------------------------------------------------------------------------------------------------------------------------------------------------------------------------------------------------------------------------------------------------------------------------------------------------------------------------------------------------------------------------------------------------------------------------------------------------------------------------------------------------------------------------------------------------------------------------------------------------------------------------------------------------------------------------------------|-----------------------|-----------------------|-----------------------|-----------------------|-----------|----------------|------------------|-----------------------|-----------------------|-----------------------|-----------------------|-----------------------|-----------------|-----------------------|-----------------------|-----------------------|-----------------------|-----------------------|--------------------------------------|-----------------------|-----------------------|-----------------------|-----------------------|-----------------------|------------|-----------------------|-----------------------|-----------------------|-----------------------|-----------------------|------------|-----------------------|-----------------------|-----------------------|-----------------------|-----------------------|
| 1. Your name (optional)                                                                                                                                                                                                                                                                                                                                                                                                                                                                                                                                                                                                                                                                                                                                                                                                                                                                            | [Free text]                                                                                                                                                                                                                                                                                                                                                                                                                                                                                                                                                                                                                                                                                                                                                                                                                                                                                                                                                                                                                                                                                                                                                                                             |                       |                       |                       |                       |           |                |                  |                       |                       |                       |                       |                       |                 |                       |                       |                       |                       |                       |                                      |                       |                       |                       |                       |                       |            |                       |                       |                       |                       |                       |            |                       |                       |                       |                       |                       |
| 2. The organisation where you work (optional)                                                                                                                                                                                                                                                                                                                                                                                                                                                                                                                                                                                                                                                                                                                                                                                                                                                      | [Free text]                                                                                                                                                                                                                                                                                                                                                                                                                                                                                                                                                                                                                                                                                                                                                                                                                                                                                                                                                                                                                                                                                                                                                                                             |                       |                       |                       |                       |           |                |                  |                       |                       |                       |                       |                       |                 |                       |                       |                       |                       |                       |                                      |                       |                       |                       |                       |                       |            |                       |                       |                       |                       |                       |            |                       |                       |                       |                       |                       |
| 3. The industry you work in                                                                                                                                                                                                                                                                                                                                                                                                                                                                                                                                                                                                                                                                                                                                                                                                                                                                        | <input type="radio"/> HealthCare Provider<br><input type="radio"/> Academia<br><input type="radio"/> Technology & Artificial Intelligence<br><input type="radio"/> Regulation<br><input type="radio"/> Pharmaceutical Industry<br><input type="radio"/> Other (please specify) [Free text]                                                                                                                                                                                                                                                                                                                                                                                                                                                                                                                                                                                                                                                                                                                                                                                                                                                                                                              |                       |                       |                       |                       |           |                |                  |                       |                       |                       |                       |                       |                 |                       |                       |                       |                       |                       |                                      |                       |                       |                       |                       |                       |            |                       |                       |                       |                       |                       |            |                       |                       |                       |                       |                       |
| 4. How do you make use of health care data in your role?                                                                                                                                                                                                                                                                                                                                                                                                                                                                                                                                                                                                                                                                                                                                                                                                                                           | [Free text]                                                                                                                                                                                                                                                                                                                                                                                                                                                                                                                                                                                                                                                                                                                                                                                                                                                                                                                                                                                                                                                                                                                                                                                             |                       |                       |                       |                       |           |                |                  |                       |                       |                       |                       |                       |                 |                       |                       |                       |                       |                       |                                      |                       |                       |                       |                       |                       |            |                       |                       |                       |                       |                       |            |                       |                       |                       |                       |                       |
| 5. Do you believe these dimensions and rating represented above are useful measures of data utility?<br>Please leave any comments below.                                                                                                                                                                                                                                                                                                                                                                                                                                                                                                                                                                                                                                                                                                                                                           | [Free text]                                                                                                                                                                                                                                                                                                                                                                                                                                                                                                                                                                                                                                                                                                                                                                                                                                                                                                                                                                                                                                                                                                                                                                                             |                       |                       |                       |                       |           |                |                  |                       |                       |                       |                       |                       |                 |                       |                       |                       |                       |                       |                                      |                       |                       |                       |                       |                       |            |                       |                       |                       |                       |                       |            |                       |                       |                       |                       |                       |
| 6. Please indicate your thoughts on the importance of each dimension of the data documentation score                                                                                                                                                                                                                                                                                                                                                                                                                                                                                                                                                                                                                                                                                                                                                                                               | <table border="1"> <thead> <tr> <th></th> <th>Useless</th> <th>Not Important</th> <th>Unsure /Impartial</th> <th>Important</th> <th>Very Important</th> </tr> </thead> <tbody> <tr> <td>Document Quality</td> <td><input type="radio"/></td> <td><input type="radio"/></td> <td><input type="radio"/></td> <td><input type="radio"/></td> <td><input type="radio"/></td> </tr> <tr> <td>Data Dictionary</td> <td><input type="radio"/></td> <td><input type="radio"/></td> <td><input type="radio"/></td> <td><input type="radio"/></td> <td><input type="radio"/></td> </tr> <tr> <td>Additional Documentation and Support</td> <td><input type="radio"/></td> <td><input type="radio"/></td> <td><input type="radio"/></td> <td><input type="radio"/></td> <td><input type="radio"/></td> </tr> <tr> <td>Data Model</td> <td><input type="radio"/></td> <td><input type="radio"/></td> <td><input type="radio"/></td> <td><input type="radio"/></td> <td><input type="radio"/></td> </tr> <tr> <td>Provenance</td> <td><input type="radio"/></td> <td><input type="radio"/></td> <td><input type="radio"/></td> <td><input type="radio"/></td> <td><input type="radio"/></td> </tr> </tbody> </table> |                       | Useless               | Not Important         | Unsure /Impartial     | Important | Very Important | Document Quality | <input type="radio"/> | Data Dictionary | <input type="radio"/> | Additional Documentation and Support | <input type="radio"/> | Data Model | <input type="radio"/> | Provenance | <input type="radio"/> |
|                                                                                                                                                                                                                                                                                                                                                                                                                                                                                                                                                                                                                                                                                                                                                                                                                                                                                                    | Useless                                                                                                                                                                                                                                                                                                                                                                                                                                                                                                                                                                                                                                                                                                                                                                                                                                                                                                                                                                                                                                                                                                                                                                                                 | Not Important         | Unsure /Impartial     | Important             | Very Important        |           |                |                  |                       |                       |                       |                       |                       |                 |                       |                       |                       |                       |                       |                                      |                       |                       |                       |                       |                       |            |                       |                       |                       |                       |                       |            |                       |                       |                       |                       |                       |
| Document Quality                                                                                                                                                                                                                                                                                                                                                                                                                                                                                                                                                                                                                                                                                                                                                                                                                                                                                   | <input type="radio"/>                                                                                                                                                                                                                                                                                                                                                                                                                                                                                                                                                                                                                                                                                                                                                                                                                                                                                                                                                                                                                                                                                                                                                                                   | <input type="radio"/> | <input type="radio"/> | <input type="radio"/> | <input type="radio"/> |           |                |                  |                       |                       |                       |                       |                       |                 |                       |                       |                       |                       |                       |                                      |                       |                       |                       |                       |                       |            |                       |                       |                       |                       |                       |            |                       |                       |                       |                       |                       |
| Data Dictionary                                                                                                                                                                                                                                                                                                                                                                                                                                                                                                                                                                                                                                                                                                                                                                                                                                                                                    | <input type="radio"/>                                                                                                                                                                                                                                                                                                                                                                                                                                                                                                                                                                                                                                                                                                                                                                                                                                                                                                                                                                                                                                                                                                                                                                                   | <input type="radio"/> | <input type="radio"/> | <input type="radio"/> | <input type="radio"/> |           |                |                  |                       |                       |                       |                       |                       |                 |                       |                       |                       |                       |                       |                                      |                       |                       |                       |                       |                       |            |                       |                       |                       |                       |                       |            |                       |                       |                       |                       |                       |
| Additional Documentation and Support                                                                                                                                                                                                                                                                                                                                                                                                                                                                                                                                                                                                                                                                                                                                                                                                                                                               | <input type="radio"/>                                                                                                                                                                                                                                                                                                                                                                                                                                                                                                                                                                                                                                                                                                                                                                                                                                                                                                                                                                                                                                                                                                                                                                                   | <input type="radio"/> | <input type="radio"/> | <input type="radio"/> | <input type="radio"/> |           |                |                  |                       |                       |                       |                       |                       |                 |                       |                       |                       |                       |                       |                                      |                       |                       |                       |                       |                       |            |                       |                       |                       |                       |                       |            |                       |                       |                       |                       |                       |
| Data Model                                                                                                                                                                                                                                                                                                                                                                                                                                                                                                                                                                                                                                                                                                                                                                                                                                                                                         | <input type="radio"/>                                                                                                                                                                                                                                                                                                                                                                                                                                                                                                                                                                                                                                                                                                                                                                                                                                                                                                                                                                                                                                                                                                                                                                                   | <input type="radio"/> | <input type="radio"/> | <input type="radio"/> | <input type="radio"/> |           |                |                  |                       |                       |                       |                       |                       |                 |                       |                       |                       |                       |                       |                                      |                       |                       |                       |                       |                       |            |                       |                       |                       |                       |                       |            |                       |                       |                       |                       |                       |
| Provenance                                                                                                                                                                                                                                                                                                                                                                                                                                                                                                                                                                                                                                                                                                                                                                                                                                                                                         | <input type="radio"/>                                                                                                                                                                                                                                                                                                                                                                                                                                                                                                                                                                                                                                                                                                                                                                                                                                                                                                                                                                                                                                                                                                                                                                                   | <input type="radio"/> | <input type="radio"/> | <input type="radio"/> | <input type="radio"/> |           |                |                  |                       |                       |                       |                       |                       |                 |                       |                       |                       |                       |                       |                                      |                       |                       |                       |                       |                       |            |                       |                       |                       |                       |                       |            |                       |                       |                       |                       |                       |
| <b>7. About the Weighted Data Documentation score:</b><br>The weighted data documentation score measures the completeness and quality of the metadata describing the dataset. The score, from 0-100, represent the percentage of metadata fields that are complete and meet the quality requirements. The completeness and quality score for each field of the metadata will be "weighted" based on the comparative utility or usefulness of each of the fields contained in the metadata. If you are interested in finding out more about the weighted data documentation score and contributing your thoughts to the weightings, please follow the link to this short (approx 3 mins) supplementary survey: <a href="https://www.surveymonkey.co.uk/r/HDRUK_Data_Documentation_Score">https://www.surveymonkey.co.uk/r/HDRUK_Data_Documentation_Score</a><br>General thoughts can be left below. | [Free text]                                                                                                                                                                                                                                                                                                                                                                                                                                                                                                                                                                                                                                                                                                                                                                                                                                                                                                                                                                                                                                                                                                                                                                                             |                       |                       |                       |                       |           |                |                  |                       |                       |                       |                       |                       |                 |                       |                       |                       |                       |                       |                                      |                       |                       |                       |                       |                       |            |                       |                       |                       |                       |                       |            |                       |                       |                       |                       |                       |
| 8. Above are other dimensions considered, but not included in this proposed framework. Please include any thoughts or comments below.                                                                                                                                                                                                                                                                                                                                                                                                                                                                                                                                                                                                                                                                                                                                                              | [Free text]                                                                                                                                                                                                                                                                                                                                                                                                                                                                                                                                                                                                                                                                                                                                                                                                                                                                                                                                                                                                                                                                                                                                                                                             |                       |                       |                       |                       |           |                |                  |                       |                       |                       |                       |                       |                 |                       |                       |                       |                       |                       |                                      |                       |                       |                       |                       |                       |            |                       |                       |                       |                       |                       |            |                       |                       |                       |                       |                       |
| 9. Do you believe these dimensions and rating represented above are useful measures of data utility?<br>Please leave any comments below.                                                                                                                                                                                                                                                                                                                                                                                                                                                                                                                                                                                                                                                                                                                                                           | [Free text]                                                                                                                                                                                                                                                                                                                                                                                                                                                                                                                                                                                                                                                                                                                                                                                                                                                                                                                                                                                                                                                                                                                                                                                             |                       |                       |                       |                       |           |                |                  |                       |                       |                       |                       |                       |                 |                       |                       |                       |                       |                       |                                      |                       |                       |                       |                       |                       |            |                       |                       |                       |                       |                       |            |                       |                       |                       |                       |                       |

| 10. Please indicate the importance of each of the dimensions in the technical quality score                                                                                                                                                                                                                                                                                             | <table border="1"> <thead> <tr> <th></th> <th>Useless</th> <th>Not Important</th> <th>Unsure /Impartial</th> <th>Important</th> <th>Very Important</th> </tr> </thead> <tbody> <tr> <td>Data Quality Management Process</td> <td><input type="radio"/></td> <td><input type="radio"/></td> <td><input type="radio"/></td> <td><input type="radio"/></td> <td><input type="radio"/></td> </tr> </tbody> </table>                                                                                                                                                                                                                                                                                                                                                                                                                                                                                                                                                                                                                                                                                                                                                                        |                       | Useless               | Not Important         | Unsure /Impartial     | Important | Very Important | Data Quality Management Process | <input type="radio"/> |                      |                       |                       |                       |                       |                       |        |                       |                       |                       |                       |                       |                      |                       |                       |                       |                       |                       |            |                       |                       |                       |                       |                       |
|-----------------------------------------------------------------------------------------------------------------------------------------------------------------------------------------------------------------------------------------------------------------------------------------------------------------------------------------------------------------------------------------|----------------------------------------------------------------------------------------------------------------------------------------------------------------------------------------------------------------------------------------------------------------------------------------------------------------------------------------------------------------------------------------------------------------------------------------------------------------------------------------------------------------------------------------------------------------------------------------------------------------------------------------------------------------------------------------------------------------------------------------------------------------------------------------------------------------------------------------------------------------------------------------------------------------------------------------------------------------------------------------------------------------------------------------------------------------------------------------------------------------------------------------------------------------------------------------|-----------------------|-----------------------|-----------------------|-----------------------|-----------|----------------|---------------------------------|-----------------------|-----------------------|-----------------------|-----------------------|-----------------------|----------------------|-----------------------|-----------------------|-----------------------|-----------------------|-----------------------|--------|-----------------------|-----------------------|-----------------------|-----------------------|-----------------------|----------------------|-----------------------|-----------------------|-----------------------|-----------------------|-----------------------|------------|-----------------------|-----------------------|-----------------------|-----------------------|-----------------------|
|                                                                                                                                                                                                                                                                                                                                                                                         | Useless                                                                                                                                                                                                                                                                                                                                                                                                                                                                                                                                                                                                                                                                                                                                                                                                                                                                                                                                                                                                                                                                                                                                                                                | Not Important         | Unsure /Impartial     | Important             | Very Important        |           |                |                                 |                       |                       |                       |                       |                       |                      |                       |                       |                       |                       |                       |        |                       |                       |                       |                       |                       |                      |                       |                       |                       |                       |                       |            |                       |                       |                       |                       |                       |
| Data Quality Management Process                                                                                                                                                                                                                                                                                                                                                         | <input type="radio"/>                                                                                                                                                                                                                                                                                                                                                                                                                                                                                                                                                                                                                                                                                                                                                                                                                                                                                                                                                                                                                                                                                                                                                                  | <input type="radio"/> | <input type="radio"/> | <input type="radio"/> | <input type="radio"/> |           |                |                                 |                       |                       |                       |                       |                       |                      |                       |                       |                       |                       |                       |        |                       |                       |                       |                       |                       |                      |                       |                       |                       |                       |                       |            |                       |                       |                       |                       |                       |
| 11. In addition to this measure, another project within HDRUK is looking to develop tools to measure datasets against the six quality measures developed by the DAMA UK Working Group (as per above). These will be released at a later stage and incorporated into the overall measurements associated with the data utility framework. Please include any thoughts or comments below. | [Free text]                                                                                                                                                                                                                                                                                                                                                                                                                                                                                                                                                                                                                                                                                                                                                                                                                                                                                                                                                                                                                                                                                                                                                                            |                       |                       |                       |                       |           |                |                                 |                       |                       |                       |                       |                       |                      |                       |                       |                       |                       |                       |        |                       |                       |                       |                       |                       |                      |                       |                       |                       |                       |                       |            |                       |                       |                       |                       |                       |
| 12. Do you believe these dimensions and rating represented above are useful measures of data utility? Please leave any comments below.                                                                                                                                                                                                                                                  | [Free text]                                                                                                                                                                                                                                                                                                                                                                                                                                                                                                                                                                                                                                                                                                                                                                                                                                                                                                                                                                                                                                                                                                                                                                            |                       |                       |                       |                       |           |                |                                 |                       |                       |                       |                       |                       |                      |                       |                       |                       |                       |                       |        |                       |                       |                       |                       |                       |                      |                       |                       |                       |                       |                       |            |                       |                       |                       |                       |                       |
| 13. Please indicate your thoughts on the importance of this dimension                                                                                                                                                                                                                                                                                                                   | <table border="1"> <thead> <tr> <th></th> <th>Useless</th> <th>Not Important</th> <th>Unsure /Impartial</th> <th>Important</th> <th>Very Important</th> </tr> </thead> <tbody> <tr> <td>Pathway Coverage</td> <td><input type="radio"/></td> <td><input type="radio"/></td> <td><input type="radio"/></td> <td><input type="radio"/></td> <td><input type="radio"/></td> </tr> <tr> <td>Length of Follow up</td> <td><input type="radio"/></td> <td><input type="radio"/></td> <td><input type="radio"/></td> <td><input type="radio"/></td> <td><input type="radio"/></td> </tr> </tbody> </table>                                                                                                                                                                                                                                                                                                                                                                                                                                                                                                                                                                                    |                       | Useless               | Not Important         | Unsure /Impartial     | Important | Very Important | Pathway Coverage                | <input type="radio"/> | Length of Follow up  | <input type="radio"/> |        |                       |                       |                       |                       |                       |                      |                       |                       |                       |                       |                       |            |                       |                       |                       |                       |                       |
|                                                                                                                                                                                                                                                                                                                                                                                         | Useless                                                                                                                                                                                                                                                                                                                                                                                                                                                                                                                                                                                                                                                                                                                                                                                                                                                                                                                                                                                                                                                                                                                                                                                | Not Important         | Unsure /Impartial     | Important             | Very Important        |           |                |                                 |                       |                       |                       |                       |                       |                      |                       |                       |                       |                       |                       |        |                       |                       |                       |                       |                       |                      |                       |                       |                       |                       |                       |            |                       |                       |                       |                       |                       |
| Pathway Coverage                                                                                                                                                                                                                                                                                                                                                                        | <input type="radio"/>                                                                                                                                                                                                                                                                                                                                                                                                                                                                                                                                                                                                                                                                                                                                                                                                                                                                                                                                                                                                                                                                                                                                                                  | <input type="radio"/> | <input type="radio"/> | <input type="radio"/> | <input type="radio"/> |           |                |                                 |                       |                       |                       |                       |                       |                      |                       |                       |                       |                       |                       |        |                       |                       |                       |                       |                       |                      |                       |                       |                       |                       |                       |            |                       |                       |                       |                       |                       |
| Length of Follow up                                                                                                                                                                                                                                                                                                                                                                     | <input type="radio"/>                                                                                                                                                                                                                                                                                                                                                                                                                                                                                                                                                                                                                                                                                                                                                                                                                                                                                                                                                                                                                                                                                                                                                                  | <input type="radio"/> | <input type="radio"/> | <input type="radio"/> | <input type="radio"/> |           |                |                                 |                       |                       |                       |                       |                       |                      |                       |                       |                       |                       |                       |        |                       |                       |                       |                       |                       |                      |                       |                       |                       |                       |                       |            |                       |                       |                       |                       |                       |
| 14. Above are other dimensions considered, but not included in this proposed framework. Please include any thoughts or comments below.                                                                                                                                                                                                                                                  | [Free text]                                                                                                                                                                                                                                                                                                                                                                                                                                                                                                                                                                                                                                                                                                                                                                                                                                                                                                                                                                                                                                                                                                                                                                            |                       |                       |                       |                       |           |                |                                 |                       |                       |                       |                       |                       |                      |                       |                       |                       |                       |                       |        |                       |                       |                       |                       |                       |                      |                       |                       |                       |                       |                       |            |                       |                       |                       |                       |                       |
| 15. Do you believe these dimensions and rating represented above are useful measures of data utility? Please leave any comments below.                                                                                                                                                                                                                                                  | [Free text]                                                                                                                                                                                                                                                                                                                                                                                                                                                                                                                                                                                                                                                                                                                                                                                                                                                                                                                                                                                                                                                                                                                                                                            |                       |                       |                       |                       |           |                |                                 |                       |                       |                       |                       |                       |                      |                       |                       |                       |                       |                       |        |                       |                       |                       |                       |                       |                      |                       |                       |                       |                       |                       |            |                       |                       |                       |                       |                       |
| 16. Please indicate your thoughts on the importance of these dimensions                                                                                                                                                                                                                                                                                                                 | <table border="1"> <thead> <tr> <th></th> <th>Useless</th> <th>Not Important</th> <th>Unsure /Impartial</th> <th>Important</th> <th>Very Important</th> </tr> </thead> <tbody> <tr> <td>Allowable uses</td> <td><input type="radio"/></td> <td><input type="radio"/></td> <td><input type="radio"/></td> <td><input type="radio"/></td> <td><input type="radio"/></td> </tr> <tr> <td>Research Environment</td> <td><input type="radio"/></td> <td><input type="radio"/></td> <td><input type="radio"/></td> <td><input type="radio"/></td> <td><input type="radio"/></td> </tr> <tr> <td>Format</td> <td><input type="radio"/></td> <td><input type="radio"/></td> <td><input type="radio"/></td> <td><input type="radio"/></td> <td><input type="radio"/></td> </tr> <tr> <td>Access and Approvals</td> <td><input type="radio"/></td> <td><input type="radio"/></td> <td><input type="radio"/></td> <td><input type="radio"/></td> <td><input type="radio"/></td> </tr> <tr> <td>Timeliness</td> <td><input type="radio"/></td> <td><input type="radio"/></td> <td><input type="radio"/></td> <td><input type="radio"/></td> <td><input type="radio"/></td> </tr> </tbody> </table> |                       | Useless               | Not Important         | Unsure /Impartial     | Important | Very Important | Allowable uses                  | <input type="radio"/> | Research Environment | <input type="radio"/> | Format | <input type="radio"/> | Access and Approvals | <input type="radio"/> | Timeliness | <input type="radio"/> |
|                                                                                                                                                                                                                                                                                                                                                                                         | Useless                                                                                                                                                                                                                                                                                                                                                                                                                                                                                                                                                                                                                                                                                                                                                                                                                                                                                                                                                                                                                                                                                                                                                                                | Not Important         | Unsure /Impartial     | Important             | Very Important        |           |                |                                 |                       |                       |                       |                       |                       |                      |                       |                       |                       |                       |                       |        |                       |                       |                       |                       |                       |                      |                       |                       |                       |                       |                       |            |                       |                       |                       |                       |                       |
| Allowable uses                                                                                                                                                                                                                                                                                                                                                                          | <input type="radio"/>                                                                                                                                                                                                                                                                                                                                                                                                                                                                                                                                                                                                                                                                                                                                                                                                                                                                                                                                                                                                                                                                                                                                                                  | <input type="radio"/> | <input type="radio"/> | <input type="radio"/> | <input type="radio"/> |           |                |                                 |                       |                       |                       |                       |                       |                      |                       |                       |                       |                       |                       |        |                       |                       |                       |                       |                       |                      |                       |                       |                       |                       |                       |            |                       |                       |                       |                       |                       |
| Research Environment                                                                                                                                                                                                                                                                                                                                                                    | <input type="radio"/>                                                                                                                                                                                                                                                                                                                                                                                                                                                                                                                                                                                                                                                                                                                                                                                                                                                                                                                                                                                                                                                                                                                                                                  | <input type="radio"/> | <input type="radio"/> | <input type="radio"/> | <input type="radio"/> |           |                |                                 |                       |                       |                       |                       |                       |                      |                       |                       |                       |                       |                       |        |                       |                       |                       |                       |                       |                      |                       |                       |                       |                       |                       |            |                       |                       |                       |                       |                       |
| Format                                                                                                                                                                                                                                                                                                                                                                                  | <input type="radio"/>                                                                                                                                                                                                                                                                                                                                                                                                                                                                                                                                                                                                                                                                                                                                                                                                                                                                                                                                                                                                                                                                                                                                                                  | <input type="radio"/> | <input type="radio"/> | <input type="radio"/> | <input type="radio"/> |           |                |                                 |                       |                       |                       |                       |                       |                      |                       |                       |                       |                       |                       |        |                       |                       |                       |                       |                       |                      |                       |                       |                       |                       |                       |            |                       |                       |                       |                       |                       |
| Access and Approvals                                                                                                                                                                                                                                                                                                                                                                    | <input type="radio"/>                                                                                                                                                                                                                                                                                                                                                                                                                                                                                                                                                                                                                                                                                                                                                                                                                                                                                                                                                                                                                                                                                                                                                                  | <input type="radio"/> | <input type="radio"/> | <input type="radio"/> | <input type="radio"/> |           |                |                                 |                       |                       |                       |                       |                       |                      |                       |                       |                       |                       |                       |        |                       |                       |                       |                       |                       |                      |                       |                       |                       |                       |                       |            |                       |                       |                       |                       |                       |
| Timeliness                                                                                                                                                                                                                                                                                                                                                                              | <input type="radio"/>                                                                                                                                                                                                                                                                                                                                                                                                                                                                                                                                                                                                                                                                                                                                                                                                                                                                                                                                                                                                                                                                                                                                                                  | <input type="radio"/> | <input type="radio"/> | <input type="radio"/> | <input type="radio"/> |           |                |                                 |                       |                       |                       |                       |                       |                      |                       |                       |                       |                       |                       |        |                       |                       |                       |                       |                       |                      |                       |                       |                       |                       |                       |            |                       |                       |                       |                       |                       |
| 17. Above are other dimensions considered, but not included in this proposed framework. Please include any thoughts or comments below.                                                                                                                                                                                                                                                  | [Free text]                                                                                                                                                                                                                                                                                                                                                                                                                                                                                                                                                                                                                                                                                                                                                                                                                                                                                                                                                                                                                                                                                                                                                                            |                       |                       |                       |                       |           |                |                                 |                       |                       |                       |                       |                       |                      |                       |                       |                       |                       |                       |        |                       |                       |                       |                       |                       |                      |                       |                       |                       |                       |                       |            |                       |                       |                       |                       |                       |
| 18. Do you believe these dimensions and rating represented above are useful measures of data utility? Please leave any comments below.                                                                                                                                                                                                                                                  | [Free text]                                                                                                                                                                                                                                                                                                                                                                                                                                                                                                                                                                                                                                                                                                                                                                                                                                                                                                                                                                                                                                                                                                                                                                            |                       |                       |                       |                       |           |                |                                 |                       |                       |                       |                       |                       |                      |                       |                       |                       |                       |                       |        |                       |                       |                       |                       |                       |                      |                       |                       |                       |                       |                       |            |                       |                       |                       |                       |                       |

|                                                                                                                                                                                                                                                      |                               |                       |                       |                       |                       |                       |
|------------------------------------------------------------------------------------------------------------------------------------------------------------------------------------------------------------------------------------------------------|-------------------------------|-----------------------|-----------------------|-----------------------|-----------------------|-----------------------|
| 19. Please indicate your thoughts on the importance of these dimensions                                                                                                                                                                              |                               | Useless               | Not Important         | Unsure /Impartial     | Important             | Very Important        |
|                                                                                                                                                                                                                                                      | Number of Access Requests     | <input type="radio"/> |
|                                                                                                                                                                                                                                                      | Provenance of Access Requests | <input type="radio"/> |
|                                                                                                                                                                                                                                                      | Current Usage                 | <input type="radio"/> |
|                                                                                                                                                                                                                                                      | Linkages                      | <input type="radio"/> |
|                                                                                                                                                                                                                                                      | Data Enrichments              | <input type="radio"/> |
| 20. Any final comments can be added below                                                                                                                                                                                                            | [Free text]                   |                       |                       |                       |                       |                       |
| 21. <b>OPTIONAL:</b><br>If you are interested in receiving feedback on the results of the survey, you can leave your email in the box below. Note: your email address will only be used for the purposes of sending through feedback once available. | [Free text]                   |                       |                       |                       |                       |                       |
