# Supplementary material for: Development of a data utility framework to support effective health data curation
Source: HighWire-hosted journal article supplement (doi:10.1136/bmjhci-2020-100303), 2021-05-01
Supplement: bmjhci-2020-100303supp005_data_supplement.pdf [file bmjhci-2020-100303supp005_data_supplement.pdf]

Online Supplemental Table 5. Framework as at August 2020

| Category                      | Dimension                                | Definition                                                                                      | Bronze                                                                                                       | Silver                                                                                                | Gold                                                                                                  | Platinum                                                                                                        |
|-------------------------------|------------------------------------------|-------------------------------------------------------------------------------------------------|--------------------------------------------------------------------------------------------------------------|-------------------------------------------------------------------------------------------------------|-------------------------------------------------------------------------------------------------------|-----------------------------------------------------------------------------------------------------------------|
| <b>Data Documentation</b>     | Documentation Quality                    | Weighted Data Documentation Score                                                               | < 66% of submitted metadata fields meet format and content requirements of the metadata specification        | < 76% of submitted metadata fields meet format and content requirements of the metadata specification | < 86% of submitted metadata fields meet format and content requirements of the metadata specification | < 96% of submitted metadata fields meet format and content requirements of the metadata specification           |
|                               | Data Model                               | Availability of clear, documented data model                                                    | Known and accepted data model but some key field un-coded or free text                                       | Key fields codified using a local standard                                                            | Key fields codified using a national or international standard                                        | Data Model conforms to a national standard and key fields codified using a national / international standard    |
|                               | Data Dictionary                          | Provided documented data dictionary and terminologies                                           | Data definitions available                                                                                   | Definitions compiled into local data dictionary which is available online                             | Dictionary available online, and relates to national definitions                                      | Dictionary is based on international standards and includes mapping                                             |
|                               | Provenance                               | Clear description of source and history of the dataset, providing a "transparent data pipeline" | Source of the dataset is documented                                                                          | Source of the dataset and any transformations, rules and exclusions documented                        | All original data items listed, all transformations, rules and exclusion listed and impact of these   | Ability to view earlier versions, including "raw" dataset, and review the impact of each stage of data cleaning |
| <b>Technical Quality</b>      | Data Quality Management Process          | The level of maturity of the data quality management processes                                  | A documented data management plan covering collection, auditing, and management is available for the dataset | Evidence that the data management plan has been implemented is available                              |                                                                                                       | Externally verified compliance with the data management plan                                                    |
|                               | DAMA Data Quality Element - Completeness | The proportion of stored data against the potential of "100% complete"                          | <i>Set initial figures for this</i>                                                                          |                                                                                                       |                                                                                                       |                                                                                                                 |
|                               | DAMA Data Quality Element - Validity     | Data are valid if it conforms to the syntax (format, type, range) of its definition.            |                                                                                                              |                                                                                                       |                                                                                                       |                                                                                                                 |
| <b>Coverage</b>               | Pathway coverage                         | Representation of multi-disciplinary healthcare data                                            | Contains data from a single speciality or area                                                               | Contains data from multiple specialties or services within a single tier of care                      | Contains multimodal data or data that is linked across two tiers (e.g. primary and secondary care)    | Contains data across the whole pathway of care                                                                  |
|                               | Length of follow up                      | Average timeframe in which a patient appears in a dataset (follow up period)                    | Between 1 - 6 months                                                                                         | Between 6 - 12 months                                                                                 | Between 1 - 10 years                                                                                  | More than 10 years                                                                                              |
| <b>Access &amp; Provision</b> | Allowable uses                           | Allowable dataset usages as per the licencing agreement                                         |                                                                                                              | Non-consented, aggregate data for specific academic uses (following IG approval)                      | Aggregate data, for academic and specific commercial uses (following IG approval)                     | Fully consented for commercial uses (following IG approval)                                                     |

|                             |                      |                                                                                                      |                                                                                                                  |                                                                                                    |                                                                                                                                                                         |                                                                                                                                            |
|-----------------------------|----------------------|------------------------------------------------------------------------------------------------------|------------------------------------------------------------------------------------------------------------------|----------------------------------------------------------------------------------------------------|-------------------------------------------------------------------------------------------------------------------------------------------------------------------------|--------------------------------------------------------------------------------------------------------------------------------------------|
|                             | Research environment | Access, tooling and environment (once approved)                                                      | Requested analysis can be undertaken by internal teams and provided back in anonymised format to data requestors | Users can access the dataset in a Trusted Research Environment                                     |                                                                                                                                                                         | The dataset can be used in a Trusted Research Environment, and other data and tools can be securely brought in as needed                   |
|                             | Access and approvals | Information Governance Process for gaining approval to access data                                   | Contact details for the relevant authority to request data access                                                | Indicative timeframes for processing data access applications detailed                             | Details of application process and requirements                                                                                                                         | Detailed Information Governance process described, outlining requirements for applications, basis of decisions, and anticipated timeframes |
|                             | Time Lag             | Lag between the data being collected and added to the dataset                                        | Approximately 1 year                                                                                             | Approximately 1 month                                                                              | Approximately 1 week                                                                                                                                                    | Effectively real time data                                                                                                                 |
|                             | Timeliness           | Average data access request timeframe                                                                | More than 12 months                                                                                              | Less than 12 months                                                                                | Less than 6 months                                                                                                                                                      | Less than 3 months                                                                                                                         |
| <b>Value &amp; Interest</b> | Linkages             | Ability to link with other datasets                                                                  | Identifiers to demonstrate ability to link to other datasets                                                     | Available linkages outlined and/or List of datasets previously successfully linked provided        | List of restrictions on the type of linkages detailed. List of previously successful dataset linkages performed, with navigable links to linked datasets via at DOI/URL | Existing linkage with reusable or downstream approvals                                                                                     |
|                             | Data Enrichments     | Data sources enriched with annotations, image labels, phenomes, derivations, NLP derived data labels | The data include additional derived fields, or enriched data.                                                    | The data include additional derived fields, or enriched data used by other available data sources. | The derived fields or enriched data were generated from, or used by, a peer reviewed algorithm.                                                                         | The data includes derived fields or enriched data from a national report.                                                                  |
